# Supplementary material
Source: HighWire-hosted journal article supplement (https://jnm.snmjournals.org/highwire/filestream/124084/field_highwire_adjunct_files/0/268217_Supplemental_Data.pdf)
Supplement: 268217_Supplemental_Data.pdf [file 268217_Supplemental_Data.pdf]

## Supplemental Data

**Supplemental Table 1: Individual administered activities**

| Patient | Number of Cycles | Activity 1 <sup>st</sup> Cycle [MBq] | Activity 2 <sup>nd</sup> Cycle [MBq] | Activity 3 <sup>rd</sup> Cycle [MBq] | Activity 4 <sup>th</sup> Cycle [MBq] | Cumulative Activity administered [GBq] |
|---------|------------------|--------------------------------------|--------------------------------------|--------------------------------------|--------------------------------------|----------------------------------------|
| P1      | 4                | 7120                                 | 7600                                 | 7591                                 | 7532                                 | 29.8                                   |
| P2      | 4                | 7382                                 | 7669                                 | 7400                                 | 7400                                 | 29.9                                   |
| P3      | 4                | 7600                                 | 7542                                 | 7500                                 | 7382                                 | 30.0                                   |
| P4      | 4                | 7400                                 | 6000                                 | 7426                                 | 7504                                 | 28.3                                   |
| P5      | 2                | 7451                                 | 7490                                 | -                                    | -                                    | 14.9                                   |
| P6      | 4                | 7422                                 | 7461                                 | 7400                                 | 7402                                 | 29.7                                   |
| P7      | 4                | 7403                                 | 7540                                 | 7451                                 | 7402                                 | 29.8                                   |
| P8      | 3                | 7359                                 | 7505                                 | 7416                                 | -                                    | 22.3                                   |
| P9      | 4                | 7470                                 | 7428                                 | 7484                                 | 7524                                 | 29.9                                   |
| P10     | 4                | 7395                                 | 7468                                 | 7514                                 | 7700                                 | 30.1                                   |
| P11     | 4                | 7486                                 | 7370                                 | 7444                                 | 7339                                 | 29.6                                   |
| P12     | 3                | 7500                                 | 7471                                 | 7448                                 | -                                    | 22.4                                   |
| P13     | 1                | 7457                                 | -                                    | -                                    | -                                    | 7.5                                    |

*Patient 5 passed away after the second treatment cycle of unknown cause, patient 8 passed away after the third treatment cycle due to progressive disease and patient 13 passed away after the first treatment cycle of heart failure. Patient 12 refused to receive a fourth cycle.*

**Supplemental Table 2: Adverse events: Hematotoxicity**

| Adverse event    | Grade 1                                | Grade 2                              | Grade 3                           | Grade 4                   | Any Grade         |
|------------------|----------------------------------------|--------------------------------------|-----------------------------------|---------------------------|-------------------|
| Anemia           | 76.9 %<br>(10/13)*<br>(<LLN – 100 g/L) | 46.2 %<br>(6/13)<br>(<100 – 80 g/L)  | 7.7 % (1/13)<br>(<80 g/L)         | - (Life-threatening)      | 84.6 %<br>(11/13) |
| Thrombocytopenia | 38.5 %<br>(5/13)<br>(<LLN – 75/nl)     | 30.8 %<br>(4/13)<br>(<75 – 50/nl)    | 15.4 %<br>(2/13)<br>(<50 – 25/nl) | - (< 25/nl)               | 46.2 % (6/13)     |
| Leucocytopenia   | 46.2 %<br>(6/13)<br>(<LLN – 3/nl†)     | - (<3 – 2/nl)                        | - (<2 – 1/nl)                     | - (<1/nl)                 | 46.2 % (6/13)     |
| Lymphocytopenia  | 53.8 %<br>(7/13)<br>(<LLN – 0.8/nl)    | 84.6 %<br>(11/13)<br>(<0.8 – 0.5/nl) | 38.5 %<br>(5/13) (<0.5 – 0.2/nl)  | 7.7 % (1/13)<br>(<0.2/nl) | 84.6 %<br>(11/13) |

\*: 2 patients already had first-grade anemia before PRRT

†: if LLN was 3/nl or less, grade 1 leucopenia was defined as 4-3/nl

Percentages of patients with mostly transient hematotoxicity (absolute number of patients/entire cohort). The definition for each specific grade according to CTCAE v. 5.0 is shown below the specific values (1). Some patients showed more than one grade of the specific adverse event. LLN = lower limit of normal

**Supplemental Table 3: Adverse events: Hepatotoxicity**

| Adverse event                                | Grade 1                                               | Grade 2                                              | Grade 3                                 | Grade 4                           | Any Grade        |
|----------------------------------------------|-------------------------------------------------------|------------------------------------------------------|-----------------------------------------|-----------------------------------|------------------|
| GGT increase<br>(Gamma-glutamyltransferase)  | 38.5 %<br>(5/13)<br>(>ULN – 2.5 x ULN <sup>*</sup> )  | 23.1 %<br>(3/13)<br>(>2.5 – 5.0 x ULN <sup>†</sup> ) | -<br>(>5.0 – 20.0 x ULN <sup>‡</sup> )  | -<br>(>20.0 x ULN <sup>§</sup> )  | 46.2 %<br>(6/13) |
| AST increase<br>(Aspartate aminotransferase) | 23.1 %<br>(3/13)<br>(>ULN – 3.0 x ULN <sup>  </sup> ) | -<br>(>3.0 – 5.0 x ULN <sup>¶</sup> )                | -<br>(> 5.0 – 20.0 x ULN <sup>#</sup> ) | -<br>(> 20.0 x ULN <sup>§</sup> ) | 23.1 %<br>(3/13) |
| ALT increase<br>(Alanine aminotransferase)   | 46.2 %<br>(6/13)<br>(>ULN – 3.0 x ULN <sup>  </sup> ) | -<br>(>3.0 – 5.0 x ULN <sup>¶</sup> )                | -<br>(> 5.0 – 20.0 x ULN <sup>#</sup> ) | -<br>(> 20.0 x ULN <sup>§</sup> ) | 46.2 %<br>(6/13) |
| Hypoalbuminemia                              | -<br>(<LLN – 30 g/L)                                  | 15.4 %<br>(2/13)<br>(<30 – 20 g/L)                   | -<br>(<20 g/L)                          | - (Life-threatening)              | 15.4 %<br>(2/13) |

<sup>\*</sup>: if baseline was normal; 2 – 2.5 x baseline if baseline was abnormal

<sup>†</sup>: if baseline was normal; >2.5 – 5.0 x baseline if baseline was abnormal

<sup>‡</sup>: if baseline was normal; >5.0 – 20.0 x baseline if baseline was abnormal

<sup>§</sup>: if baseline was normal; 20.0 x baseline if baseline was abnormal

<sup>||</sup>: if baseline was normal; 1.5 – 3.0 x baseline if baseline was abnormal

<sup>¶</sup>: if baseline was normal; 3.0 – 5.0 x baseline if baseline was abnormal

<sup>#</sup>: if baseline was normal; >5.0 – 20.0 x baseline if baseline was abnormal

Percentages of patients with transient hepatotoxicity (absolute number of patients/entire cohort). The definition for each specific grade according to CTCAE v. 5.0 is shown below the specific values (1). Some patients showed more than one grade of the specific adverse event. ULN = upper limit of normal; LLN = lower limit of normal

**Supplemental Table 4: Adverse events: Nephrotoxicity**

| Adverse event                             | Grade 1                                                                   | Grade 2                                                                | Grade 3                                                          | Grade 4                                                           | Any Grade         |
|-------------------------------------------|---------------------------------------------------------------------------|------------------------------------------------------------------------|------------------------------------------------------------------|-------------------------------------------------------------------|-------------------|
| Creatinine increase                       | 53.8 %<br>(7/13)<br>(>ULN – 1.5 x ULN)                                    | 7.7 % (1/13)<br>(>1.5 – 3.0 ULN <sup>*</sup> )                         | 7.7 %<br>(1/13) <sup>‡</sup><br>(>3.0 – 6.0 x ULN <sup>†</sup> ) | -<br>(> 6.0 x ULN)                                                | 53.8 %<br>(7/13)  |
| GFR decrease (glomerular filtration rate) | 76.9 %<br>(10/13) <sup>§</sup><br>(<LLN – 60 ml/min/1.73 m <sup>2</sup> ) | 46.2 %<br>(6/13) <sup>§</sup><br>(59 – 30 ml/min/1.73 m <sup>2</sup> ) | -<br>(29 – 15 ml/min/1.73 m <sup>2</sup> )                       | 7.7 %<br>(1/13) <sup>‡</sup><br>(<15 ml/min/1.73 m <sup>2</sup> ) | 84.6 %<br>(11/13) |

<sup>\*</sup>: or >1.5 – 3.0 x baseline

<sup>†</sup>: or >3.0 x baseline

<sup>‡</sup>: associated with post-renal acute kidney injury

<sup>§</sup>: 9 patients already had lower grade GFR reduction before PRRT

Percentages of patients with (transient) nephrotoxicity (absolute number of patients/entire cohort). The definition for each specific grade according to CTCAE v. 5.0 is shown below the specific values (**1**). Some patients showed more than one grade of the specific adverse event. ULN = upper limit of normal; LLN = lower limit of normal

**Supplemental Table 5:** Progression free survival (PFS) and overall survival (OS) according to CNS WHO grade after 6, 12, 18 and 24 months.

| Survival          | CNS WHO 1   | CNS WHO 2   | Unknown     | All            |
|-------------------|-------------|-------------|-------------|----------------|
| PFS (n = 13)      |             |             |             |                |
| PFS 6             | 100 % (4/4) | 25 % (1/4)* | 100 % (5/5) | 76.9 % (10/13) |
| PFS 12            | 100 % (4/4) | 25 % (1/4)* | 100 % (5/5) | 76.9 % (10/13) |
| PFS 18            | 75 % (3/4)  | 25 % (1/4)* | 60 % (3/5)  | 53.8 % (7/13)  |
| PFS 24            | 75 % (3/4)  | 25 % (1/4)* | 40 % (2/5)  | 46.2 % (6/13)  |
| <b>Median PFS</b> | 24 months   | 4 months    | 18 months   | 18 months      |
| OS (n = 13)       |             |             |             |                |
| OS 6              | 100 % (4/4) | 75 % (3/4)  | 100 % (5/5) | 92.3 % (12/13) |
| OS 12             | 100 % (4/4) | 50 % (2/4)  | 100 % (5/5) | 84.6 % (11/13) |
| OS 18             | 75 % (3/4)  | 50 % (2/4)  | 60 % (3/5)  | 61.5 % (8/13)  |
| OS 24             | 75 % (3/4)  | 50 % (2/4)  | 40 % (2/5)  | 53.8 % (7/13)  |
| <b>Median OS</b>  | Not reached | Not reached | Not reached | Not reached    |

\*: one patient with grade 2 meningioma passed away of heart failure; one patient with grade 2 meningioma experienced progressive frailty that could not be confirmed radiologically.

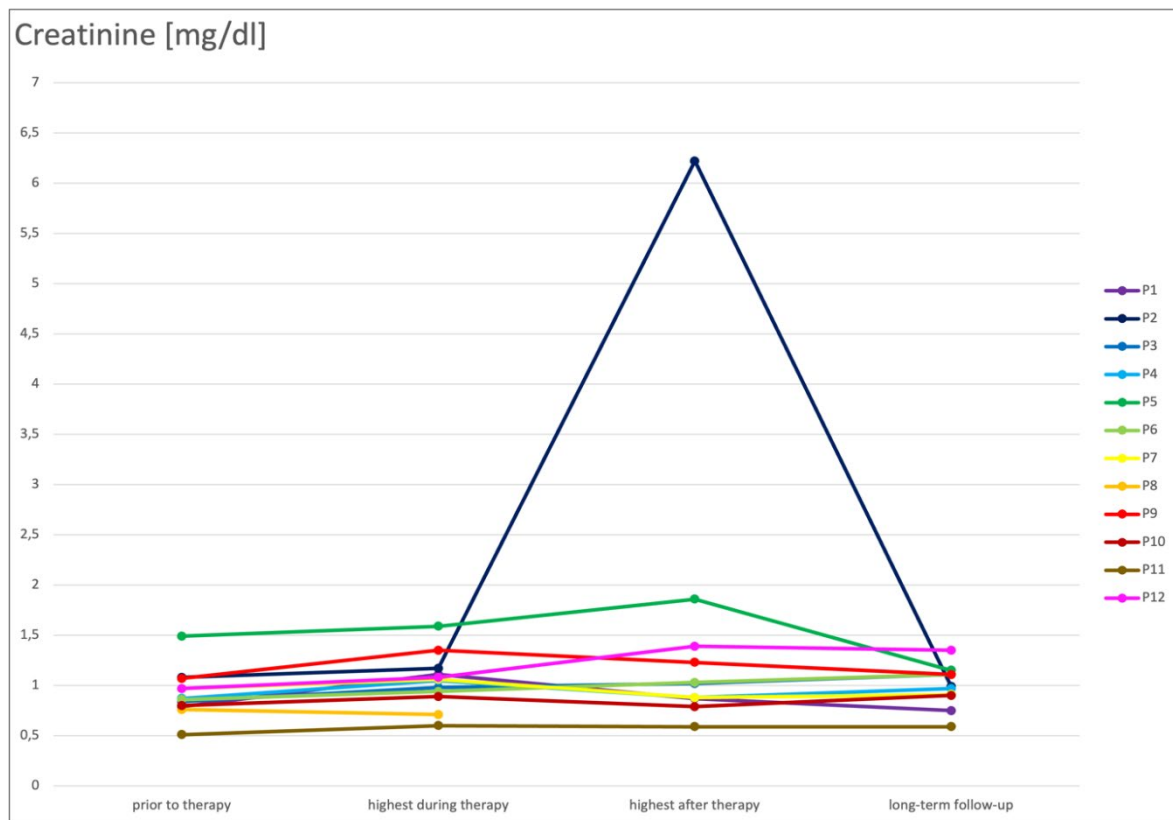

**Supplemental Figure 1:** Creatinine prior to therapy, highest during and after therapy and long-term follow-up if available.

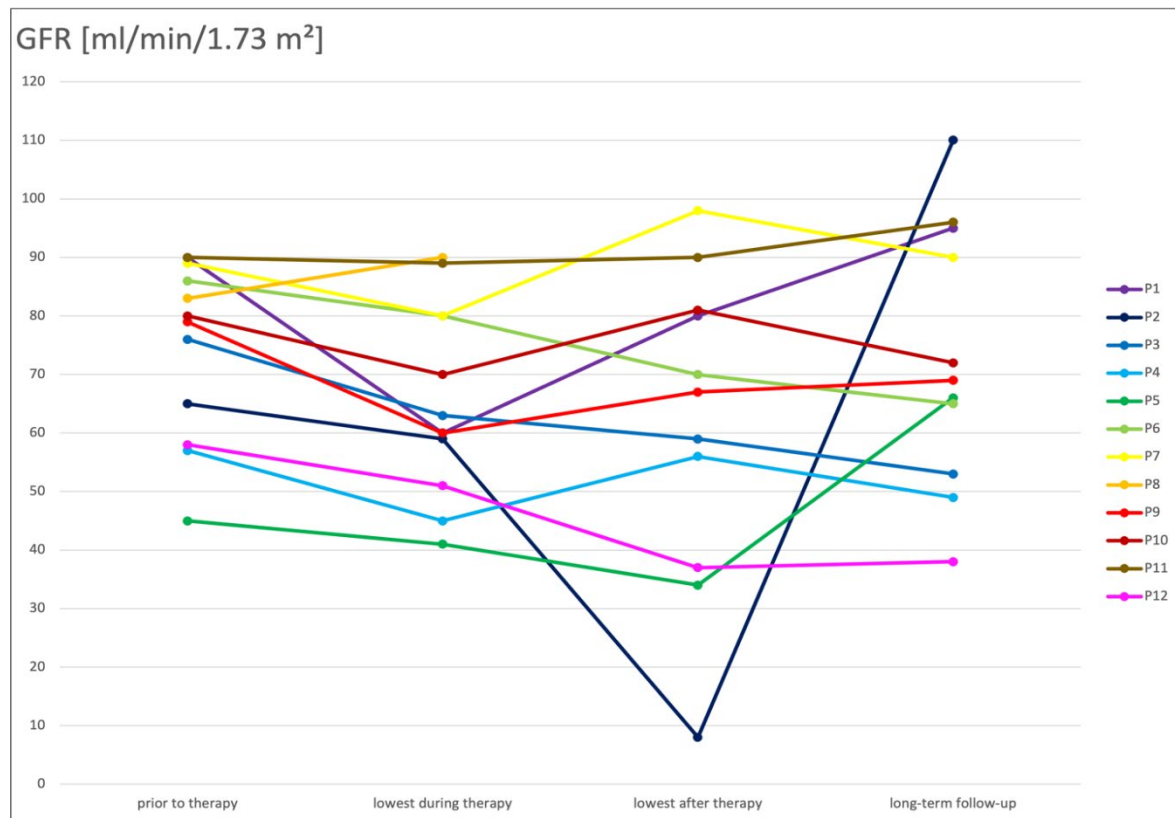

**Supplemental Figure 2:** Glomerular filtration rate (GFR) prior to therapy, lowest during and after therapy and long-term follow-up if available.

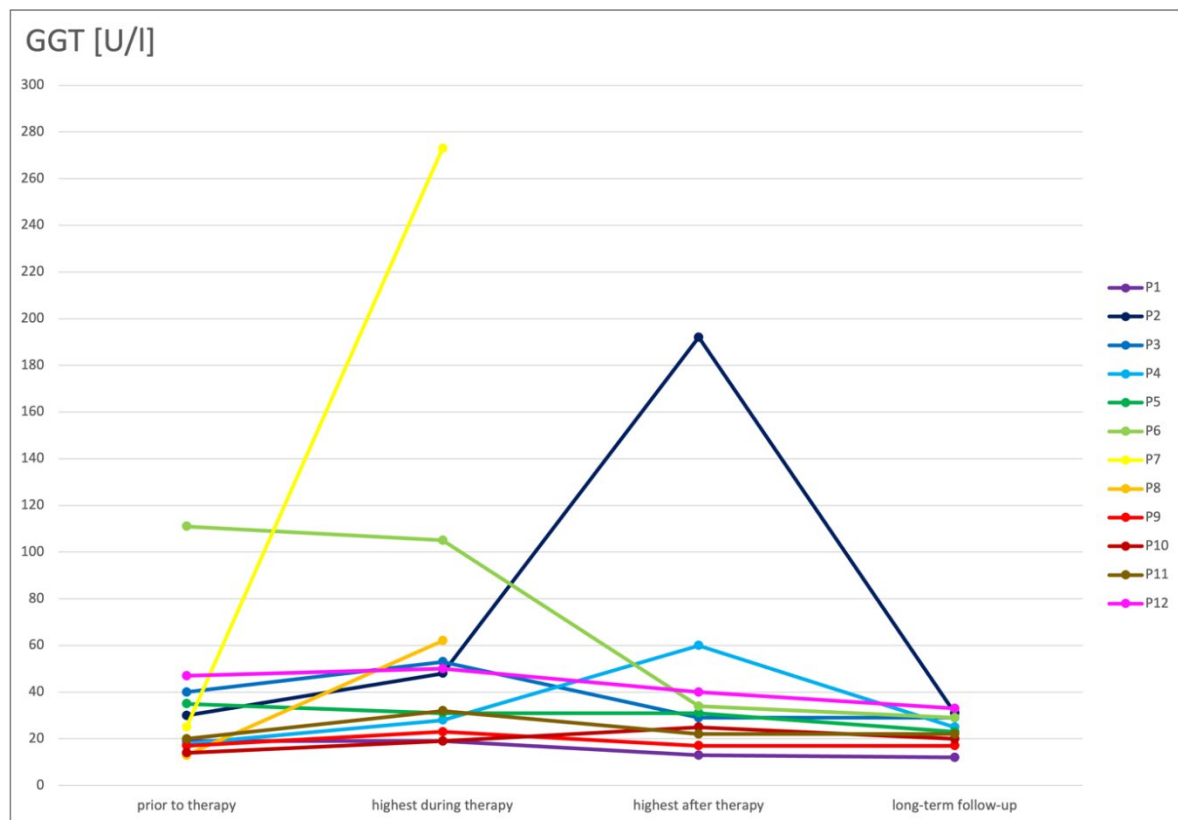

**Supplemental Figure 3:** Gamma-glutamyl transferase (GGT) prior to therapy, highest during and after therapy and long-term follow-up if available.



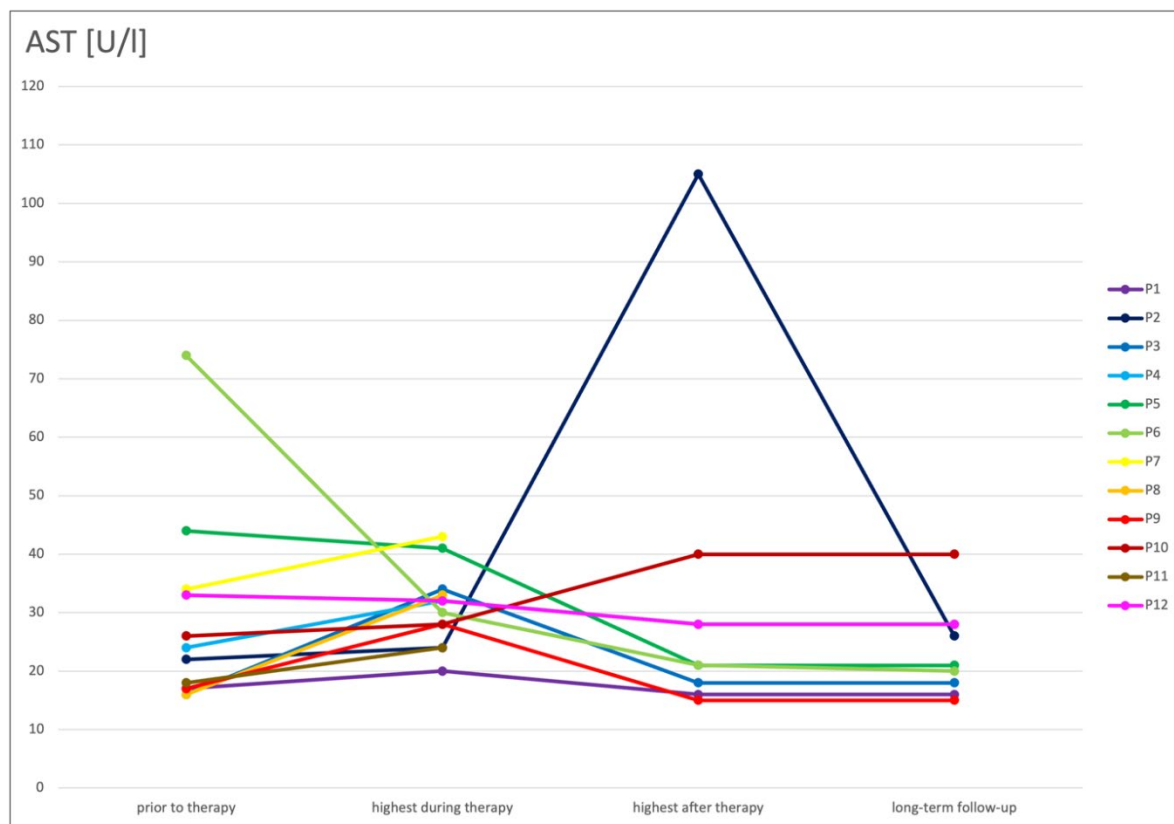

**Supplemental Figure 4:** Aspartate aminotransferase (AST) prior to therapy, highest during and after therapy and long-term follow-up if available.

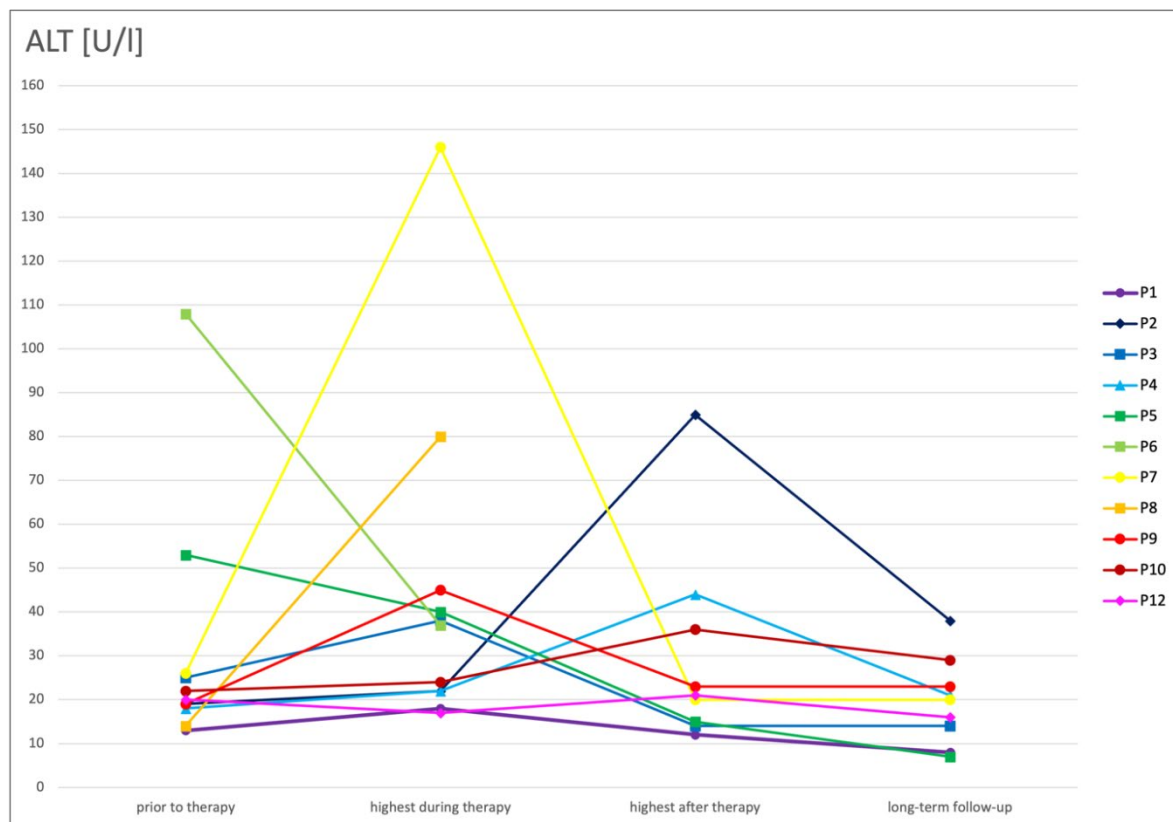

**Supplemental Figure 5:** Alanine aminotransferase (ALT) prior to therapy, highest during and after therapy and long-term follow-up if available.

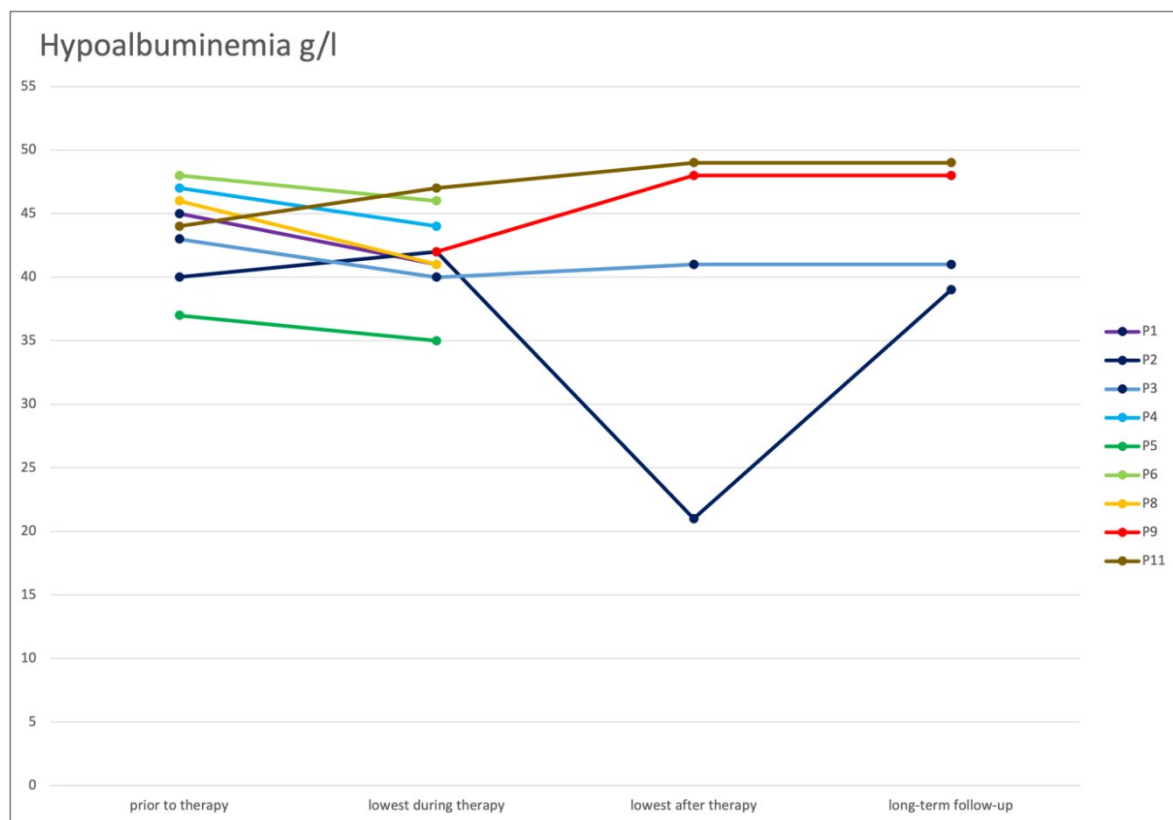

**Supplemental Figure 6:** Albumin prior to therapy, lowest during and after therapy and long-term follow-up if available.

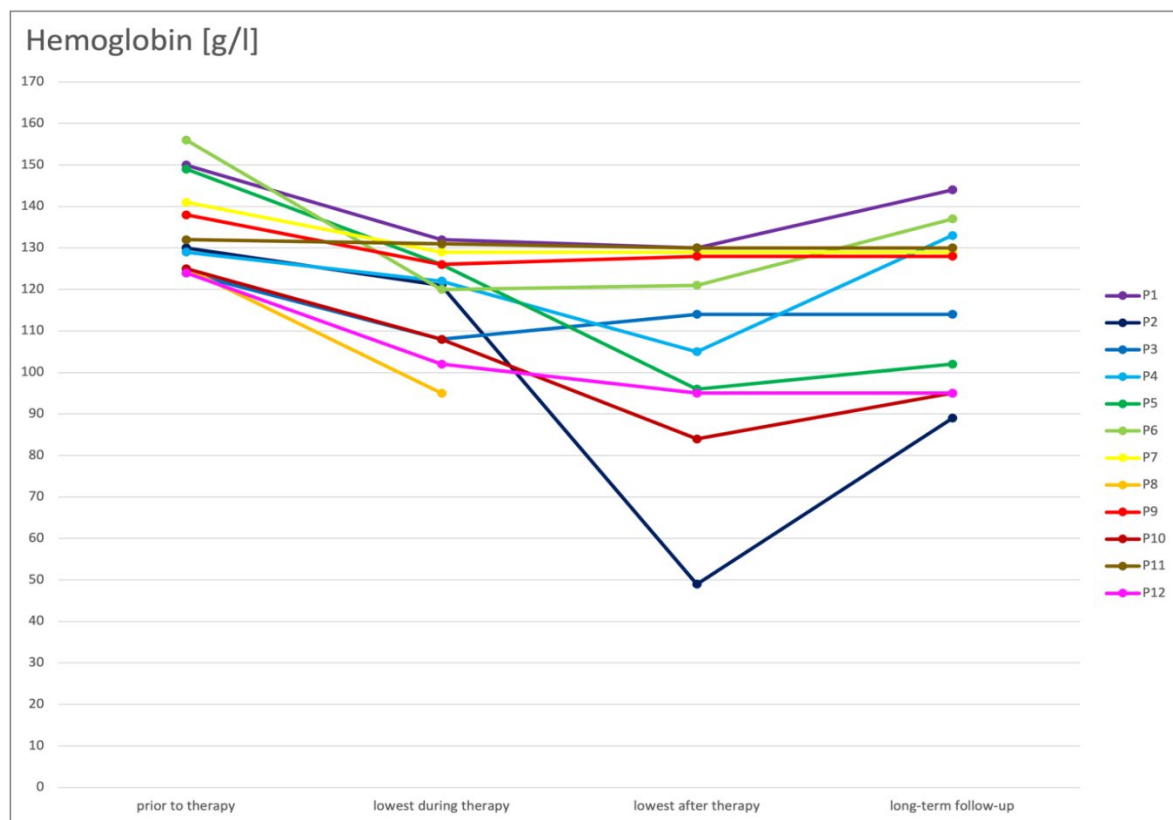

**Supplemental Figure 7:** Hemoglobin prior to therapy, lowest during and after therapy and long-term follow-up if available.

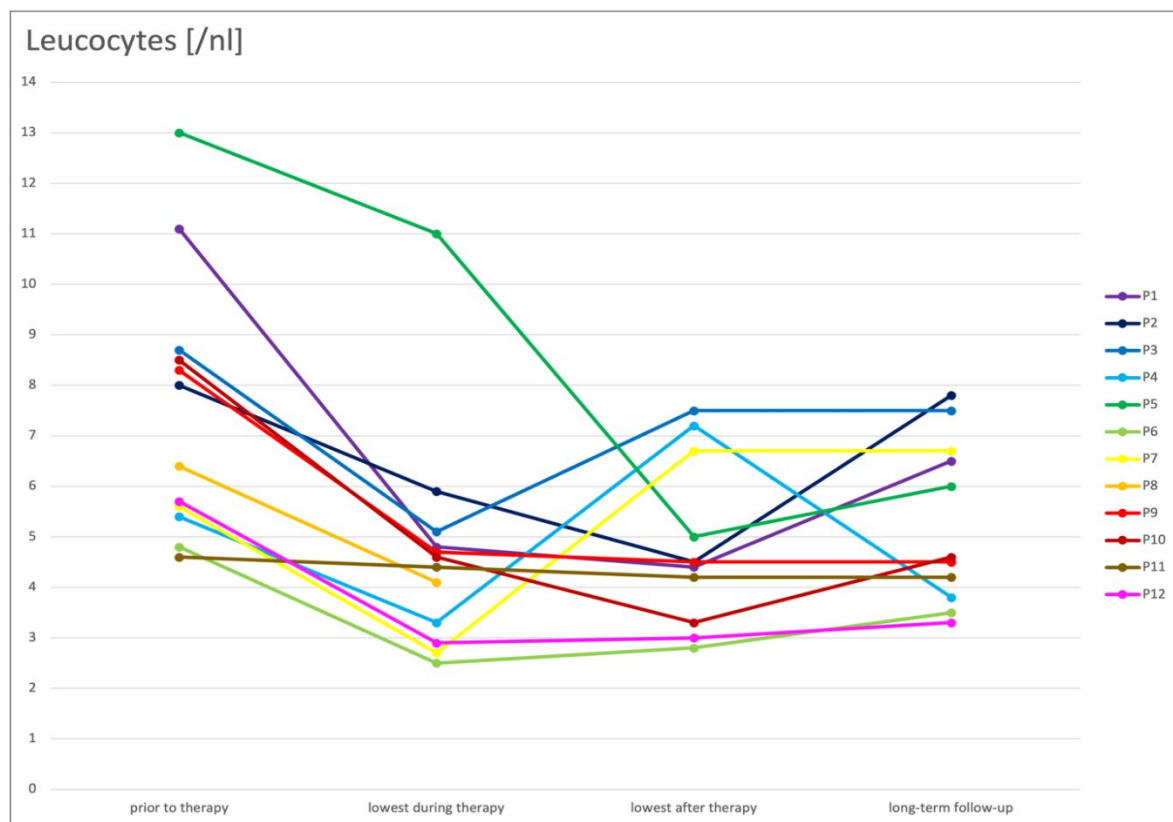

**Supplemental Figure 8:** Leukocyte count prior to therapy, lowest during and after therapy and long-term follow-up if available.

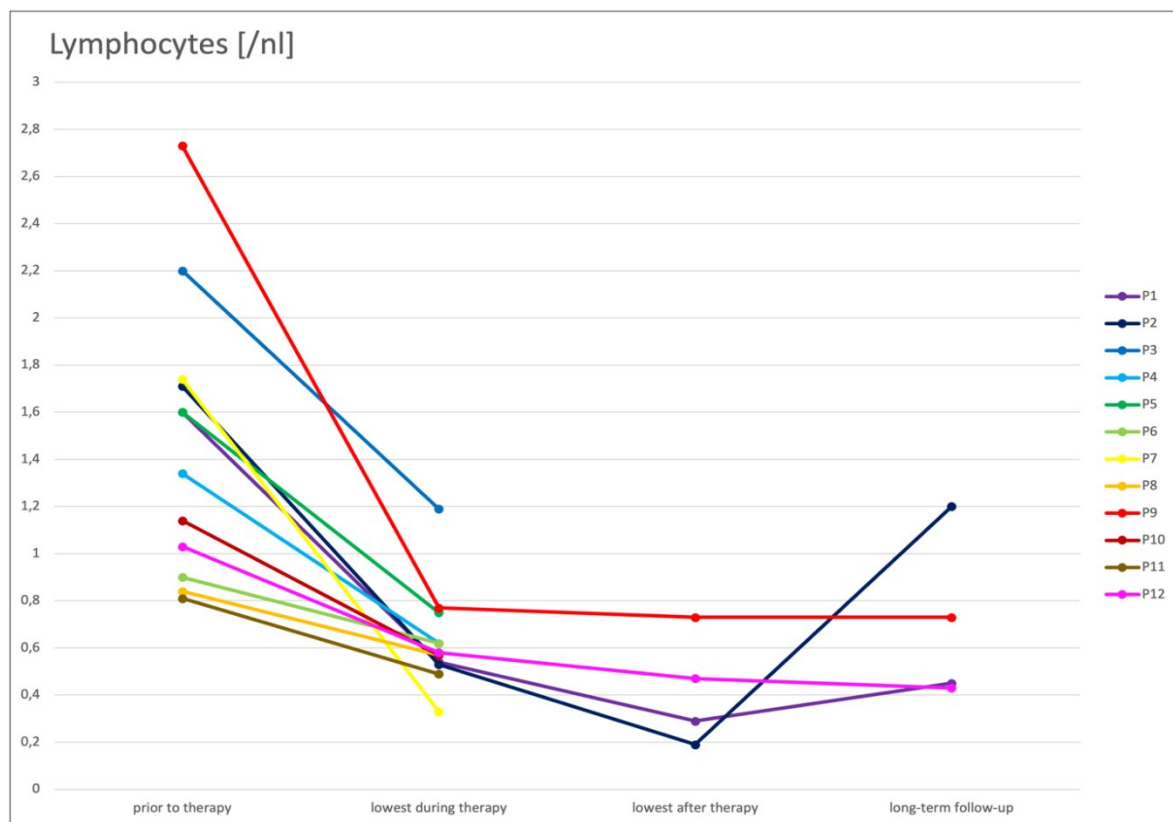

**Supplemental Figure 9:** Lymphocyte count prior to therapy, lowest during and after therapy and long-term follow-up if available.

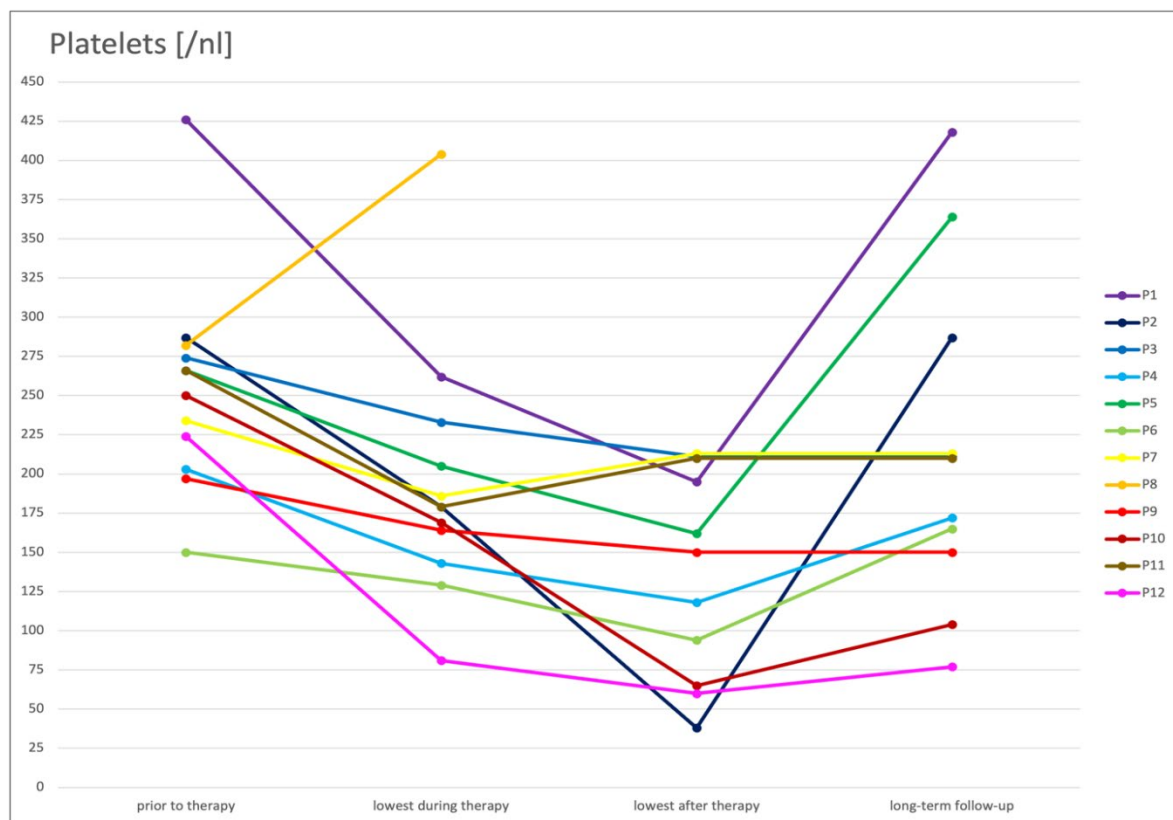

**Supplemental Figure 10:** Platelet count prior to therapy, lowest during and after therapy and long-term follow-up if available.

## References

1. US Department of Health and Services, Common Terminology Criteria for Adverse Events (CTCAE) Version 5.0. 2017.
